# Supplementary material for: Unveiling the bioactivity of Allium triquetrum L. lipophilic fractions: chemical characterization and in vitro antibacterial activity against methicillin-resistant Staphylococcus aureus
Source: Royal Society of Chemistry journal article supplement (doi:10.1039/d0fo00769b), 2020-01-01
Supplement: d0fo00769b1.pdf [file d0fo00769b1.pdf]

## Supplementary Material

### **Unveiling the bioactivity potential of *Allium triquetrum* L. lipophilic fraction: chemical characterization and *in vitro* antibacterial effect against methicillin-resistant *Staphylococcus aureus***

Samia Rabah<sup>1</sup>, Kahina Kouachi<sup>2,3</sup>, Patrícia A. B. Ramos<sup>4,5</sup>, Ana Peixoto Gomes<sup>6</sup>, Adelaide Almeida<sup>6</sup>, Hayate Haddadi-Guemghar<sup>1</sup>, Madani Khodir<sup>1,7</sup>, Armando J. D. Silvestre<sup>4</sup>, Sónia A. O. Santos<sup>4\*</sup>

<sup>1</sup>Laboratoire de Biomathématiques, Biophysique Biochimie et de Scientométrie, Faculté des Sciences de la Nature et de la Vie, Université de Bejaia, 06000 Bejaia, Algérie

<sup>2</sup>Faculté des Sciences de la Nature et de la Vie, Département des Troncs Communs, Université de Bejaia, 06000 Bejaia, Algérie

<sup>3</sup>Laboratoire de Physico-Chimie des Matériaux et Catalyse, Faculté des sciences Exactes, Université de Bejaia, 06000 Bejaia, Algérie

<sup>4</sup>CICECO - Aveiro Institute of Materials and Department of Chemistry, University of Aveiro, 3810-193 Aveiro, Portugal

<sup>5</sup>QOPNA & LAQV-REQUIMTE, Department of Chemistry, University of Aveiro, 3810-193 Aveiro, Portugal

<sup>6</sup>Department of Biology and CESAM, University of Aveiro, 3810-193 Aveiro, Portugal.

<sup>7</sup>Centre de recherche en technologie agro-alimentaire, Route de Targua-ouzemour, 06000 Bejaia, Algérie

\*corresponding author: [santos.sonia@ua.pt](mailto:santos.sonia@ua.pt)

**Table S1:** Composition (mg g<sup>-1</sup> of extract) of *A. triquetrum* L. bulbs, flowers and leaves lipophilic extracts.<sup>a</sup>

| <b>RT<br/>(min)</b>            | <b>Compound</b>            | <b>Bulbs</b>  | <b>Flowers</b> | <b>Leaves</b> |
|--------------------------------|----------------------------|---------------|----------------|---------------|
| <b>Fatty acids</b>             |                            | <b>115.50</b> | <b>91.28</b>   | <b>68.48</b>  |
| <i>Saturated fatty acids</i>   |                            | 51.35         | 30.19          | 22.63         |
| 25.44                          | Dodecanoic acid            | 0.21          | 0.20           | 0.76          |
| 30.83                          | Tetradecanoic acid         | 0.89          | 0.70           | 1.94          |
| 33.34                          | Pentadecanoic acid         | 0.46          | 0.19           | 0.18          |
| 35.74                          | Hexadecanoic acid          | 32.70         | 16.50          | 11.23         |
| 38.03                          | Heptadecanoic acid         | 0.35          | 0.23           | 0.09          |
| 40.24                          | Octadecanoic acid          | 5.16          | 4.12           | 2.04          |
| 44.40                          | Eicosanoic acid            | 1.51          | 3.00           | 0.89          |
| 46.37                          | Heneicosanoic acid         | 0.13          | 0.16           | 0.14          |
| 48.26                          | Docosanoic acid            | 3.21          | 1.39           | 0.78          |
| 50.09                          | Tricosanoic acid           | 1.03          | -              | -             |
| 51.93                          | Tetracosanoic acid         | 2.61          | 1.24           | 0.99          |
| 53.91                          | Pentacosanoic acid         | 0.32          | -              | -             |
| 55.98                          | Hexacosanoic acid          | 0.68          | 0.38           | 0.48          |
| 60.41                          | Octacosanoic acid          | 0.71          | 1.11           | 2.41          |
| 65.30                          | Triacontanoic acid         | 1.39          | 0.97           | 0.71          |
| <i>Unsaturated fatty acids</i> |                            | 64.15         | 61.07          | 45.79         |
| 35.02                          | (9Z)-Hexadeca-9-enoic acid | 0.55          | 0.11           | 0.06          |
| 35.11                          | (9E)-Hexadeca-9-enoic acid | 0.83          | 0.21           | 0.05          |
| 35.4                           | Hexadecenoic acid isomer   | 0.14          | 0.14           | 0.14          |

|                                       |                                             |              |              |              |
|---------------------------------------|---------------------------------------------|--------------|--------------|--------------|
| 39.35                                 | (9Z,12Z)-Octadeca-9,12-dienoic acid         | 34.90        | 31.78        | 18.13        |
| 39.44                                 | (9Z,12Z,15Z)-Octadeca-9,12,15-trienoic acid | -            | 17.88        | 22.61        |
| 39.55                                 | (9Z)-Octadeca-9-enoic acid                  | 25.71        | 9.43         | 3.93         |
| 39.70                                 | (9E)-Octadeca-9-enoic acid                  | 2.02         | 1.28         | 0.73         |
| 39.94                                 | Octadecenoic acid isomer                    | -            | 0.24         | 0.12         |
|                                       | <i>Hydroxy fatty acids</i>                  | -            | 0.02         | 0.06         |
| 12.05                                 | 4-Hydroxybutanoic acid                      | -            | 0.02         | 0.06         |
| <b>Long chain aliphatic alcohols</b>  |                                             | <b>10.33</b> | <b>12.42</b> | <b>26.84</b> |
| 33.9                                  | Hexadecan-1-ol                              | 0.30         | 0.07         | -            |
| 38.53                                 | Octadecan-1-ol                              | 0.29         | 0.04         | -            |
| 46.74                                 | Docosan-1-ol                                | 0.37         | 0.09         | -            |
| 50.41                                 | Tetracosan-1-ol                             | 0.83         | 0.29         | 0.30         |
| 54.26                                 | Hexacosan-1-ol                              | 1.03         | 0.55         | 0.82         |
| 58.51                                 | Octacosan-1-ol                              | 2.49         | 8.04         | 21.34        |
| 63.08                                 | Triacontan-1-ol                             | 1.43         | 3.32         | 3.74         |
| 68.87                                 | Dotriacontan-1-ol                           | 3.58         | -            | 0.65         |
| <b>Long chain aliphatic alkanes</b>   |                                             | <b>26.19</b> | <b>39.81</b> | <b>4.36</b>  |
| 37.10                                 | Heneicosane                                 | -            | 0.93         | -            |
| 41.55                                 | Tricosane                                   | 0.85         | 3.71         | 0.13         |
| 45.65                                 | Pentacosane                                 | 7.94         | 3.18         | 0.34         |
| 49.45                                 | Heptacosane                                 | 2.90         | 6.81         | 0.50         |
| 53.23                                 | Nonacosane                                  | 4.37         | 13.35        | 1.03         |
| 57.44                                 | Hentriacontane                              | 10.13        | 11.83        | 2.37         |
| <b>Long chain aliphatic aldehydes</b> |                                             | <b>1.06</b>  | <b>3.26</b>  | <b>8.50</b>  |

|                                    |                                                    |              |              |              |
|------------------------------------|----------------------------------------------------|--------------|--------------|--------------|
| 51.60                              | Hexacosanal                                        | 0.45         | -            | -            |
| 55.70                              | Octacosanal                                        | 0.61         | 2.34         | 7.08         |
| 60.21                              | Triacontanal                                       | -            | 0.92         | 1.42         |
| <b>Long chain aliphatic ketone</b> |                                                    | <b>7.46</b>  | <b>81.02</b> | <b>25.35</b> |
| 61.24                              | Hentricontan-16-one                                | 7.46         | 81.02        | 25.35        |
| <b>Monoglycerides</b>              |                                                    | <b>11.01</b> | <b>2.46</b>  | <b>8.58</b>  |
| 47.59                              | 2,3-Dihydroxypropyl hexadecanoate                  | 3.41         | 1.02         | 0.91         |
| 50.51                              | 2,3-Dihydroxypropyl (9Z,12Z)-9,12-octadecadienoate | 1.77         | 0.66         | 1.62         |
| 50.62                              | 2,3-Dihydroxypropyl (9Z)-9-octadecenoate           | 1.91         | 0.78         | 2.60         |
| 59.35                              | 2,3-Dihydroxypropyl docosanoate                    | 2.45         | -            | -            |
| 64.99                              | 2,3-Dihydroxypropyl tetracosanoate                 | 1.48         | -            | 3.44         |
| <b>Sterols</b>                     |                                                    | <b>11.16</b> | <b>6.39</b>  | <b>7.06</b>  |
| 58.17                              | Cholesterol                                        | -            | 0.60         | 0.37         |
| 60.54                              | Campesterol                                        | 1.36         | 0.51         | 0.19         |
| 62.63                              | $\beta$ -Sitosterol                                | 8.09         | 3.93         | 2.98         |
| 62.90                              | $\beta$ -Sitostanol                                | 1.70         | 1.35         | 3.51         |
| <b>Aromatic compound</b>           |                                                    | <b>3.10</b>  | <b>1.70</b>  | <b>4.24</b>  |
| 20.94                              | Vanillin                                           | 0.19         | -            | 0.05         |
| 21.47                              | Cinnamic acid                                      | 0.17         | 0.13         | 0.25         |
| 22.98                              | Tyrosol                                            | 2.35         | 0.78         | 2.64         |
| 24.55                              | 4-Hydroxybenzoic acid                              | -            | 0.07         | -            |
| 28.32                              | Vanillic Acid                                      | 0.20         | 0.10         | 0.14         |
| 36.45                              | ( <i>E</i> )-ferulic acid                          | 0.19         | 0.61         | 1.16         |

|               |                                      |               |               |               |
|---------------|--------------------------------------|---------------|---------------|---------------|
| <b>Others</b> |                                      | <b>20.74</b>  | <b>10.79</b>  | <b>10.28</b>  |
| 14.17         | Glycerol                             | 12.16         | 10.04         | 6.31          |
| 38.95         | Phytol                               | -             | 0.26          | 1.44          |
| 58.05         | $\alpha$ -Tocopherol                 | -             | 0.48          | 2.53          |
| 68.14         | 1-mono(22-hydroxydocosanoyl)glycerol | 8.58          | -             | -             |
| <b>Total</b>  |                                      | <b>206.56</b> | <b>249.12</b> | <b>163.67</b> |

<sup>a</sup>Results are the average of the concordant values obtained (less than 5% variation between injection) for the three samples injected in duplicate.
